# Supplementary material for: Association of Child and Family Attributes With Outcomes in Children With Autism
Source: PubMed Central journal article supplement (PMC8008283; doi:10.1001/jamanetworkopen.2021.2530), 2021-03-29

## Supplemental Online Content

Szatmari P, Cost KT, Duku E, et al. Association of child and family attributes with outcomes in children with autism. *JAMA Netw Open*. 2021;4(3):e212530.  
doi:10.1001/jamanetworkopen.2021.2530

**eTable 1.** Missingness of T1 and T2 Characteristics of Participants

**eTable 2.** Spearman's Correlation Coefficients Between Outcome Measures (CBCL and VABS-II) and Predictor Measures (Ways of Coping, General Family Function) That Were Combined

**eTable 3.** Unweighted Cohen's Kappa for Agreement Between Binary Good Outcome Variables in the 5 Domains at T2 Within a Quantification Method at T2, and Agreement Between Quantification Methods

**eTable 4.** Percent with Teacher-Completed SRS Scores  $\leq 60$  (Below Cut-off for ASD) or  $> 60$  (Above Cut-off for ASD) for Each Outcome Metric Within Each Domain

**eTable 5.** Omnibus Tests for Logistic Regression Models and Hosmer-Lemeshow for Suitability of Logistic Regression for Growth and Proficiency Metrics Across All Domains

**eTable 6.** Sensitivity Analysis to Control for Variables Associated With Attrition in the Larger Pathways Study of T1 Variables Associated With T2 Metrics Doing Well in Each of the Five Domains (Omnibus  $\alpha = 0.005$ )

**eFigure.** Flow Chart of 5 Data Points in the Larger Pathways in ASD Study

This supplemental material has been provided by the authors to give readers additional information about their work.

**eTable 1.** Missingness of T1 and T2 Characteristics of Participants. Significance tests are between participants with T1 data only and participants T1 & T2 data with independent t-tests for continuous data and Pearson's chi-square for categorical data. \* p < .05; \*\* p < .01

|                                                            | <i>participants with T1 data only</i> |                  | <i>participants with T1 and T2 data</i> |                  | <b>p</b> |
|------------------------------------------------------------|---------------------------------------|------------------|-----------------------------------------|------------------|----------|
|                                                            | <b>n</b>                              | <b>mean (SD)</b> | <b>n</b>                                | <b>mean (SD)</b> |          |
| <b>VABS communication *</b>                                | 129                                   | 70.50<br>(15.17) | 272                                     | 74.59<br>(16.26) | 0.02*    |
| <b>VABS activities of daily living</b>                     | 129                                   | 76.50<br>(11.82) | 272                                     | 76.08<br>(11.42) | 0.73     |
| <b>VABS social</b>                                         | 129                                   | 72.32 (9.05)     | 272                                     | 72.20 (9.12)     | 0.91     |
| <b>CBCL internalising</b>                                  | 105                                   | 59.96 (9.22)     | 255                                     | 60.29 (9.25)     | 0.79     |
| <b>CBCL externalising</b>                                  | 105                                   | 55.08<br>(10.16) | 255                                     | 56.52<br>(10.44) | 0.22     |
| <b>Merrill-Palmer</b>                                      | 102                                   | 53.57<br>(25.90) | 237                                     | 58.51<br>(25.85) | 0.09     |
| <b>PLS-4 *</b>                                             | 122                                   | 62.08<br>(18.16) | 262                                     | 66.74<br>(19.50) | 0.02*    |
| <b>Parent disengaged emotion-focused coping</b>            | 103                                   | 0.02 (1.10)      | 262                                     | 0.00 (0.96)      | 0.89     |
| <b>General Family Functioning</b>                          | 109                                   | 1.77 (0.52)      | 260                                     | (1.75 (0.47)     | 0.75     |
|                                                            | <b>n</b>                              | <b>%</b>         | <b>n</b>                                | <b>%</b>         | <b>p</b> |
| <b>Bachelors' or more education attained by PMK</b>        | 112                                   | 42.9             | 260                                     | 41.6             | 0.76     |
| <b>Bachelors' or more education attained by partner</b>    | 95                                    | 36.9             | 248                                     | 36.7             | 0.99     |
| <b>Married or common law **</b>                            | 111                                   | 80.2             | 262                                     | 92.4             | < 0.01** |
| <b>Full-time employment of PMK</b>                         | 112                                   | 31.3             | 263                                     | 28.9             | 0.60     |
| <b>Full-time employments of partner</b>                    | 96                                    | 83.3             | 251                                     | 83.3             | 0.94     |
| <b>Self-report household income &gt; \$80,000 per year</b> | 109                                   | 33.0             | 256                                     | 39.8             | 0.23     |
| <b>European ethnic/cultural heritage of PMK</b>            | 111                                   | 78.4             | 263                                     | 71.5             | 0.17     |
| <b>European ethnic/cultural heritage of partner</b>        | 96                                    | 79.2             | 252                                     | 73.8             | 0.34     |

| <b>eTable 2.</b> Spearman's Correlation Coefficients Between Outcome Measures (CBCL and VABS-II) and Predictor Measures (Ways of Coping, General Family Function) That Were Combined. |     |        |
|---------------------------------------------------------------------------------------------------------------------------------------------------------------------------------------|-----|--------|
| CBCL Internalising                                                                                                                                                                    | n   | r      |
| between 8.74 and 10.76 years                                                                                                                                                          | 143 | 0.75** |
| CBCL Externalising                                                                                                                                                                    |     |        |
| between 8.74 and 10.76 years                                                                                                                                                          | 143 | 0.69** |
| VABS-II Communication                                                                                                                                                                 |     |        |
| between 8.74 and 10.76 years                                                                                                                                                          | 199 | 0.69** |
| VABS-II Activities of Daily Living                                                                                                                                                    |     |        |
| between 8.74 and 10.76 years                                                                                                                                                          | 198 | 0.87** |
| VABS-II Socialisation                                                                                                                                                                 |     |        |
| between 8.74 and 10.76 years                                                                                                                                                          | 197 | 0.82** |
| Ways of Coping: Disengaged, emotion-focused                                                                                                                                           |     |        |
| between 3.41 and 4.02 years                                                                                                                                                           | 254 | 0.60** |
| between 3.41 and 4.53 years                                                                                                                                                           | 236 | 0.60** |
| between 4.02 and 4.53 years                                                                                                                                                           | 212 | 0.71** |
| General Family Functioning                                                                                                                                                            |     |        |
| between 3.41 and 4.02 years                                                                                                                                                           | 259 | 0.62** |
| between 3.41 and 4.53 years                                                                                                                                                           | 249 | 0.56** |
| between 4.02 and 4.53 years                                                                                                                                                           | 212 | 0.75** |
| ** p< 0.001; r: Spearman's rho; VABS-II: Vineland Adaptive Behavior Scales, Second Edition; CBCL Child Behavior Checklist                                                             |     |        |

**eTable 3.** Unweighted Cohen's Kappa for agreement between binary good outcome variables in the 5 domains at T2 within a quantification method at T2, and agreement between quantification methods.

| Domains                       | Within T2 Proficiency |                      |                     |                      | Within Growth        |                      |                      |                      | Between T2 Proficiency and Growth |
|-------------------------------|-----------------------|----------------------|---------------------|----------------------|----------------------|----------------------|----------------------|----------------------|-----------------------------------|
|                               | 1                     | 2                    | 3                   | 4                    | 1                    | 2                    | 3                    | 4                    |                                   |
| 1 VABS-II Communication       |                       |                      |                     |                      |                      |                      |                      |                      | 0.29<br>(0.18-0.40)               |
| 2 VABS-II Daily Living Skills | 0.57*<br>(0.46-0.66)  |                      |                     |                      | 0.30<br>(0.17-0.44)  |                      |                      |                      | 0.35<br>(0.22-0.48)               |
| 3 VABS-II Socialisation       | 0.50*<br>(0.40-0.61)  | 0.43*<br>(0.32-0.57) |                     |                      | 0.35<br>(0.22-0.49)  | 0.43*<br>(0.28-0.59) |                      |                      | 0.38<br>(0.24-0.52)               |
| 4 CBCL Internalising          | 0.12<br>(-0.01-0.25)  | 0.10<br>(-0.03-0.23) | 0.20<br>(0.08-0.33) |                      | 0.09<br>(-0.04-0.22) | 0.04<br>(-0.07-0.15) | 0.08<br>(-0.04-0.20) |                      | 0.55<br>(0.44-0.67)               |
| 5 CBCL Externalising          | 0.29<br>(0.16-0.41)   | 0.26<br>(0.14-0.37)  | 0.22<br>(0.12-0.33) | 0.48*<br>(0.37-0.59) | 0.20<br>(0.06-0.33)  | 0.04<br>(-0.08-0.15) | 0.18<br>(0.05-0.31)  | 0.45*<br>(0.33-0.57) | 0.41<br>(0.30-0.53)               |

| <b>eTable 4.</b> Percent with Teacher-completed SRS scores $\leq 60$ (below cut-off for ASD) or $> 60$ (above cut-off for ASD) for each outcome metric within each domain. |                                 |                   |                                                       |                                                       |                       |                                                       |                                                       |
|----------------------------------------------------------------------------------------------------------------------------------------------------------------------------|---------------------------------|-------------------|-------------------------------------------------------|-------------------------------------------------------|-----------------------|-------------------------------------------------------|-------------------------------------------------------|
|                                                                                                                                                                            |                                 | <b>n</b>          | <b>% Teacher SRS <math>\leq 60</math><br/>(95%CI)</b> | <b>% Teacher SRS <math>&gt; 60</math><br/>(95%CI)</b> | <b>n</b>              | <b>% Teacher SRS <math>\leq 60</math><br/>(95%CI)</b> | <b>% Teacher SRS <math>&gt; 60</math><br/>(95%CI)</b> |
| <b>Growth</b>                                                                                                                                                              |                                 | <b>Growth</b>     |                                                       |                                                       | <b>No Growth</b>      |                                                       |                                                       |
|                                                                                                                                                                            | VABS Communication              | 24                | 45.8<br>(26.2-66.8)                                   | 54.2<br>(33.2-73.8)                                   | 115                   | 54.8<br>(45.3-64.0)                                   | 45.2<br>(36.0-54.7)                                   |
|                                                                                                                                                                            | VABS Socialisation              | 12                | 25.0<br>(6.7-57.2)                                    | 75.0<br>(42.8-93.3)                                   | 127                   | 55.9<br>(46.8-64.6)                                   | 44.1<br>(35.4-53.2)                                   |
|                                                                                                                                                                            | VABS Activities of Daily Living | 12                | 33.3<br>(11.3-64.6)                                   | 66.7<br>(35.4-88.7)                                   | 127                   | 55.1<br>(46.1-63.9)                                   | 44.9<br>(36.1-53.9)                                   |
|                                                                                                                                                                            | CBCL Internalising              | 40                | 52.5<br>(36.3-68.2)                                   | 47.5<br>(31.8-63.7)                                   | 82                    | 51.2<br>(40.0-62.3)                                   | 48.8<br>(37.7-60.0)                                   |
|                                                                                                                                                                            | CBCL Externalising              | 37                | 40.5<br>(25.2-57.8)                                   | 59.5<br>(42.2-74.8)                                   | 85                    | 56.5<br>(45.3-67.1)                                   | 43.5<br>(32.9-54.7)                                   |
| <b>Proficiency</b>                                                                                                                                                         |                                 | <b>Proficient</b> |                                                       |                                                       | <b>Not Proficient</b> |                                                       |                                                       |
|                                                                                                                                                                            | VABS Communication              | 50                | 30.0<br>(18.3-44.8)                                   | 70.0<br>(55.2-81.7)                                   | 89                    | 66.3<br>(55.4-75.8)                                   | 33.7<br>(24.2-44.6)                                   |
|                                                                                                                                                                            | VABS Socialisation              | 28                | 25.0<br>(11.4-45.2)                                   | 75.0<br>(54.8-88.6)                                   | 111                   | 60.4<br>(50.6-69.4)                                   | 39.6<br>(30.6-49.4)                                   |
|                                                                                                                                                                            | VABS Activities of Daily Living | 34                | 23.5<br>(11.4-41.6)                                   | 76.5<br>(58.4-88.6)                                   | 105                   | 62.9<br>(52.8-71.9)                                   | 37.1<br>(28.1-47.2)                                   |
|                                                                                                                                                                            | CBCL Internalising              | 47                | 46.8<br>(32.4-61.8)                                   | 53.2<br>(38.2-67.6)                                   | 75                    | 54.7<br>(42.8-66.1)                                   | 45.3<br>(33.9-57.2)                                   |
|                                                                                                                                                                            | CBCL Externalising              | 60                | 40.0<br>(27.8-53.5)                                   | 60.0<br>(46.5-72.2)                                   | 62                    | 62.9<br>(49.7-74.6)                                   | 37.1<br>(25.4-50.3)                                   |

**eTable 5.** Omnibus tests for logistic regression models and Hosmer-Lemeshow for suitability of logistic regression for growth and proficiency metrics across all domains.

|                                           | Proficiency               |    |         |                                                         |    |      | Growth                    |    |          |                                                         |    |      |
|-------------------------------------------|---------------------------|----|---------|---------------------------------------------------------|----|------|---------------------------|----|----------|---------------------------------------------------------|----|------|
|                                           | Omnibus test of the model |    |         | Hosmer-Lemeshow test of logistic regression suitability |    |      | Omnibus test of the model |    |          | Hosmer-Lemeshow test of logistic regression suitability |    |      |
|                                           | $\chi^2$                  | df | p       | $\chi^2$                                                | df | p    | $\chi^2$                  | df | p        | $\chi^2$                                                | df | p    |
| <b>VABS-II Communication</b>              | 70.14                     | 7  | <0.005* | 12.56                                                   | 8  | 0.13 | 27.57                     | 7  | <0.005** | 8.08                                                    | 8  | 0.43 |
| <b>VABS-II Activities of Daily Living</b> | 42.29                     | 7  | <0.005* | 6.85                                                    | 8  | 0.55 | 17.15                     | 7  | 0.02     | 2.94                                                    | 8  | 0.94 |
| <b>VABS-II Socialization</b>              | 47.61                     | 7  | <0.005* | 8.73                                                    | 8  | 0.37 | 22.73                     | 7  | <0.005** | 7.21                                                    | 8  | 0.51 |
| <b>CBCL Internalising</b>                 | 19.35                     | 7  | 0.01    | 2.17                                                    | 8  | 0.98 | 24.32                     | 7  | <0.005** | 12.83                                                   | 8  | 0.12 |
| <b>CBCL Externalising</b>                 | 44.89                     | 7  | <0.005* | 6.99                                                    | 8  | 0.54 | 33.84                     | 7  | <0.005** | 5.41                                                    | 8  | 0.71 |

**eTable 6.** Sensitivity analysis to control for variables associated with attrition in the larger Pathways study of T1 variables associated with T2 metrics doing well in each of the five domains (omnibus  $\alpha = 0.005$ ).

|                                           |                                  | PROFICIENCY |           |                  |                  |          | GROWTH   |           |                  |                  |          |
|-------------------------------------------|----------------------------------|-------------|-----------|------------------|------------------|----------|----------|-----------|------------------|------------------|----------|
|                                           |                                  | $\chi^2$    | df        | p                |                  |          | $\chi^2$ | df        | p                |                  |          |
| <b>VABS-II Communication</b>              |                                  |             |           |                  |                  |          |          |           |                  |                  |          |
|                                           | OMNIBUS test of the full model   | 71.46       | 9         | < 0.005**        |                  |          | 27.99    | 9         | 0.001**          |                  |          |
|                                           | Hosmer-Lemeshow                  | 8.44        | 8         | 0.39             |                  |          | 12.06    | 8         | 0.15             |                  |          |
|                                           |                                  | <b>B</b>    | <b>OR</b> | <b>LL 95% CI</b> | <b>UL 95% CI</b> | <b>p</b> | <b>B</b> | <b>OR</b> | <b>LL 95% CI</b> | <b>UL 95% CI</b> | <b>p</b> |
|                                           | Child age at diagnosis           | -0.02       | 0.98      | 0.94             | 1.03             | 0.40     | -0.01    | 0.99      | 0.94             | 1.04             | 0.62     |
|                                           | Age of mother at time of consent | 0.00        | 1.00      | 1.00             | 1.01             | 0.38     | 0.00     | 1.00      | 1.00             | 1.01             | 0.63     |
|                                           | SES                              | -0.14       | 0.87      | 0.43             | 1.76             | 0.70     | 0.15     | 1.17      | 0.54             | 2.54             | 0.70     |
|                                           | T1 Instrument Score              | 0.05        | 1.05      | 1.01             | 1.09             | 0.017*   | -0.07    | 0.93      | 0.90             | 0.97             | 0.001*   |
|                                           | Child biological sex             | -0.05       | 0.95      | 0.33             | 2.73             | 0.93     | -0.47    | 0.63      | 0.23             | 1.70             | 0.36     |
|                                           | Merrill Palmer                   | 0.02        | 1.02      | 1.00             | 1.05             | 0.10     | 0.02     | 1.02      | 0.99             | 1.05             | 0.16     |
|                                           | PLS-4                            | 0.02        | 1.02      | 0.98             | 1.05             | 0.33     | -0.01    | 0.99      | 0.96             | 1.03             | 0.74     |
|                                           | Ways of Coping                   | -0.97       | 0.38      | 0.13             | 1.10             | 0.08     | -0.88    | 0.41      | 0.13             | 1.35             | 0.14     |
|                                           | General Family Functioning       | -0.18       | 0.84      | 0.38             | 1.85             | 0.66     | -0.23    | 0.80      | 0.34             | 1.87             | 0.60     |
| <b>VABS-II Activities of Daily Living</b> |                                  |             |           |                  |                  |          |          |           |                  |                  |          |
|                                           | OMNIBUS test of the full model   | 45.09       | 9         | < 0.005**        |                  |          | 17.48    | 9         | 0.04             |                  |          |
|                                           | Hosmer-Lemeshow                  | 4.56        | 8         | 0.80             |                  |          | 3.44     | 8         | 0.90             |                  |          |
|                                           |                                  | <b>B</b>    | <b>OR</b> | <b>LL 95% CI</b> | <b>UL 95% CI</b> | <b>p</b> | <b>B</b> | <b>OR</b> | <b>LL 95% CI</b> | <b>UL 95% CI</b> | <b>p</b> |
|                                           | Child age at diagnosis           | -0.04       | 0.96      | 0.92             | 1.01             | 0.11     | 0.00     | 1.00      | 0.94             | 1.06             | 0.92     |
|                                           | Age of mother at time of consent | 0.00        | 1.00      | 0.99             | 1.01             | 0.75     | 0.00     | 1.00      | 0.99             | 1.01             | 0.59     |
|                                           | SES                              | -0.39       | 0.68      | 0.33             | 1.39             | 0.29     | -0.73    | 0.48      | 0.19             | 1.25             | 0.13     |
|                                           | T1 Instrument Score              | 0.06        | 1.07      | 1.03             | 1.11             | 0.001*   | -0.09    | 0.91      | 0.86             | 0.97             | 0.00     |

|                                  |                            |           |                     |                  |                    |                            |           |                  |                  |                    |
|----------------------------------|----------------------------|-----------|---------------------|------------------|--------------------|----------------------------|-----------|------------------|------------------|--------------------|
| Child biological sex             | 0.68                       | 1.97      | 0.66                | 5.90             | 0.22               | 0.70                       | 2.02      | 0.41             | 9.92             | 0.39               |
| Merrill Palmer                   | 0.00                       | 1.00      | 0.98                | 1.03             | 0.92               | 0.01                       | 1.01      | 0.98             | 1.04             | 0.55               |
| PLS-4                            | 0.03                       | 1.03      | 1.00                | 1.06             | 0.05               | 0.01                       | 1.01      | 0.97             | 1.05             | 0.79               |
| Ways of Coping                   | -0.79                      | 0.45      | 0.15                | 1.40             | 0.17               | -0.34                      | 0.71      | 0.16             | 3.26             | 0.66               |
| General Family Functioning       | -0.56                      | 0.57      | 0.25                | 1.31             | 0.19               | 0.07                       | 1.07      | 0.36             | 3.19             | 0.90               |
| <b>VABS-II Socialisation</b>     | <b><math>\chi^2</math></b> | <b>df</b> | <b>p</b>            |                  |                    | <b><math>\chi^2</math></b> | <b>df</b> | <b>p</b>         |                  |                    |
| OMNIBUS test of the full model   | 51.17                      | 9         | <b>&lt; 0.005**</b> |                  |                    | 27.25                      | 9         | <b>0.001**</b>   |                  |                    |
| Hosmer-Lemeshow                  | 11.57                      | 8         | 0.17                |                  |                    | 9.6                        | 8         | 0.29             |                  |                    |
|                                  | <b>B</b>                   | <b>OR</b> | <b>LL 95% CI</b>    | <b>UL 95% CI</b> | <b>p</b>           | <b>B</b>                   | <b>OR</b> | <b>LL 95% CI</b> | <b>UL 95% CI</b> | <b>p</b>           |
| Child age at diagnosis           | -0.05                      | 0.96      | 0.91                | 1.01             | 0.10               | -0.06                      | 0.94      | 0.88             | 1.00             | <b>0.039*</b>      |
| Age of mother at time of consent | 0.00                       | 1.00      | 1.00                | 1.01             | 0.28               | 0.00                       | 1.00      | 0.99             | 1.01             | 0.83               |
| SES                              | 0.47                       | 1.60      | 0.71                | 3.60             | 0.26               | -0.08                      | 0.92      | 0.38             | 2.25             | 0.85               |
| T1 Instrument Score              | 0.10                       | 1.10      | 1.05                | 1.16             | <b>&lt; 0.001*</b> | -0.12                      | 0.89      | 0.83             | 0.95             | <b>&lt; 0.001*</b> |
| Child biological sex             | 0.42                       | 1.53      | 0.46                | 5.10             | 0.49               | 0.73                       | 2.07      | 0.55             | 7.85             | 0.29               |
| Merrill Palmer                   | 0.03                       | 1.03      | 1.00                | 1.06             | 0.07               | 0.01                       | 1.01      | 0.98             | 1.04             | 0.50               |
| PLS-4                            | 0.01                       | 1.01      | 0.98                | 1.04             | 0.63               | 0.04                       | 1.04      | 1.00             | 1.08             | <b>0.044*</b>      |
| Ways of Coping                   | -0.45                      | 0.64      | 0.19                | 2.09             | 0.46               | -1.17                      | 0.31      | 0.07             | 1.33             | 0.12               |
| General Family Functioning       | -1.03                      | 0.36      | 0.14                | 0.91             | <b>0.031*</b>      | -0.51                      | 0.60      | 0.22             | 1.63             | 0.32               |
| <b>CBCL Internalising</b>        | <b><math>\chi^2</math></b> | <b>df</b> | <b>p</b>            |                  |                    | <b><math>\chi^2</math></b> | <b>df</b> | <b>p</b>         |                  |                    |
| OMNIBUS test of the full model   | 19.66                      | 9         | 0.02                |                  |                    | 24.41                      | 9         | <b>0.004**</b>   |                  |                    |
| Hosmer-Lemeshow                  | 5.54                       | 8         | 0.7                 |                  |                    | 7.97                       | 8         | 0.44             |                  |                    |
|                                  | <b>B</b>                   | <b>OR</b> | <b>LL 95% CI</b>    | <b>UL 95% CI</b> | <b>p</b>           | <b>B</b>                   | <b>OR</b> | <b>LL 95% CI</b> | <b>UL 95% CI</b> | <b>p</b>           |
| Child age at diagnosis           | -0.01                      | 0.99      | 0.95                | 1.04             | 0.79               | 0.00                       | 1.00      | 0.96             | 1.05             | 0.97               |
| Age of mother at time of consent | 0.00                       | 1.00      | 0.99                | 1.00             | 0.67               | 0.00                       | 1.00      | 0.99             | 1.01             | 0.79               |
| SES                              | -0.21                      | 0.81      | 0.41                | 1.61             | 0.55               | -0.02                      | 0.99      | 0.49             | 1.98             | 0.97               |
| T1 Instrument Score              | -0.05                      | 0.96      | 0.92                | 1.00             | 0.03               | 0.09                       | 1.09      | 1.04             | 1.14             | <b>&lt; 0.001*</b> |
| Child biological sex             | -0.46                      | 0.63      | 0.25                | 1.59             | 0.33               | -0.51                      | 0.60      | 0.24             | 1.53             | 0.29               |



|                                  |                            |           |                     |                  |               |                            |           |                    |                  |                    |
|----------------------------------|----------------------------|-----------|---------------------|------------------|---------------|----------------------------|-----------|--------------------|------------------|--------------------|
| Merrill Palmer                   | -0.01                      | 0.99      | 0.96                | 1.01             | 0.25          | -0.02                      | 0.98      | 0.96               | 1.01             | 0.17               |
| PLS-4                            | 0.01                       | 1.01      | 0.98                | 1.04             | 0.65          | 0.01                       | 1.01      | 0.98               | 1.04             | 0.60               |
| Ways of Coping                   | -0.04                      | 0.96      | 0.34                | 2.68             | 0.93          | 0.37                       | 1.44      | 0.50               | 4.17             | 0.50               |
| General Family Functioning       | -0.85                      | 0.43      | 0.20                | 0.94             | 0.03          | -1.02                      | 0.36      | 0.16               | 0.80             | <b>0.012*</b>      |
| <b>CBCL Externalising</b>        | <b><math>\chi^2</math></b> | <b>df</b> | <b>p</b>            |                  |               | <b><math>\chi^2</math></b> | <b>df</b> | <b>p</b>           |                  |                    |
| OMNIBUS test of the full model   | 45.93                      | 9         | <b>&lt; 0.005**</b> |                  |               | 34.47                      | 9         | <b>&lt;0.005**</b> |                  |                    |
| Hosmer-Lemeshow                  | 6.22                       | 8         | 0.62                |                  |               | 5.17                       | 8         | 0.74               |                  |                    |
|                                  | <b>B</b>                   | <b>OR</b> | <b>LL 95% CI</b>    | <b>UL 95% CI</b> | <b>p</b>      | <b>B</b>                   | <b>OR</b> | <b>LL 95% CI</b>   | <b>UL 95% CI</b> | <b>p</b>           |
| Child age at diagnosis           | 0.01                       | 1.01      | 0.97                | 1.06             | 0.57          | 0.01                       | 1.01      | 0.96               | 1.06             | 0.79               |
| Age of mother at time of consent | 0.00                       | 1.00      | 0.99                | 1.00             | 0.35          | 0.00                       | 1.00      | 0.99               | 1.00             | 0.43               |
| SES                              | -0.69                      | 0.50      | 0.25                | 1.02             | 0.06          | -0.86                      | 0.42      | 0.20               | 0.88             | <b>0.021*</b>      |
| T1 Instrument Score              | -0.07                      | 0.94      | 0.90                | 0.97             | <b>0.001*</b> | 0.10                       | 1.10      | 1.06               | 1.15             | <b>&lt; 0.001*</b> |
| Child biological sex             | 0.55                       | 1.73      | 0.66                | 4.56             | 0.26          | 0.23                       | 1.26      | 0.46               | 3.46             | 0.66               |
| Merrill Palmer                   | -0.02                      | 0.98      | 0.96                | 1.01             | 0.17          | -0.01                      | 0.99      | 0.97               | 1.02             | 0.64               |
| PLS-4                            | 0.02                       | 1.02      | 0.99                | 1.06             | 0.17          | 0.00                       | 1.00      | 0.97               | 1.03             | 0.90               |
| Ways of Coping                   | -0.98                      | 0.38      | 0.13                | 1.09             | 0.07          | -0.91                      | 0.40      | 0.13               | 1.22             | 0.11               |
| General Family Functioning       | -0.98                      | 0.37      | 0.17                | 0.85             | <b>0.018*</b> | -0.82                      | 0.44      | 0.19               | 1.03             | 0.06               |

**eFigure.** Flow Chart of the 5 Data Points in the Larger Pathways in ASD study. Data from the first three Pathways data points comprise the current study T1 time point in these analyses. Data from the second two data points comprise the study T2 time point in these analyses. When needed, we took an average of scores across the data points to minimize missing data and to provide a more stable assessment of outcome scores than relying on single time points alone. To justify the approach of using mean scores in place of single scores, we ran preliminary analysis (not shown) to consider whether measures were on average significantly correlated across time points using Pearson's correlations. In all cases, measures were significantly correlated across time points (all  $p$ 's < 0.001, all  $r$ 's > 0.49).

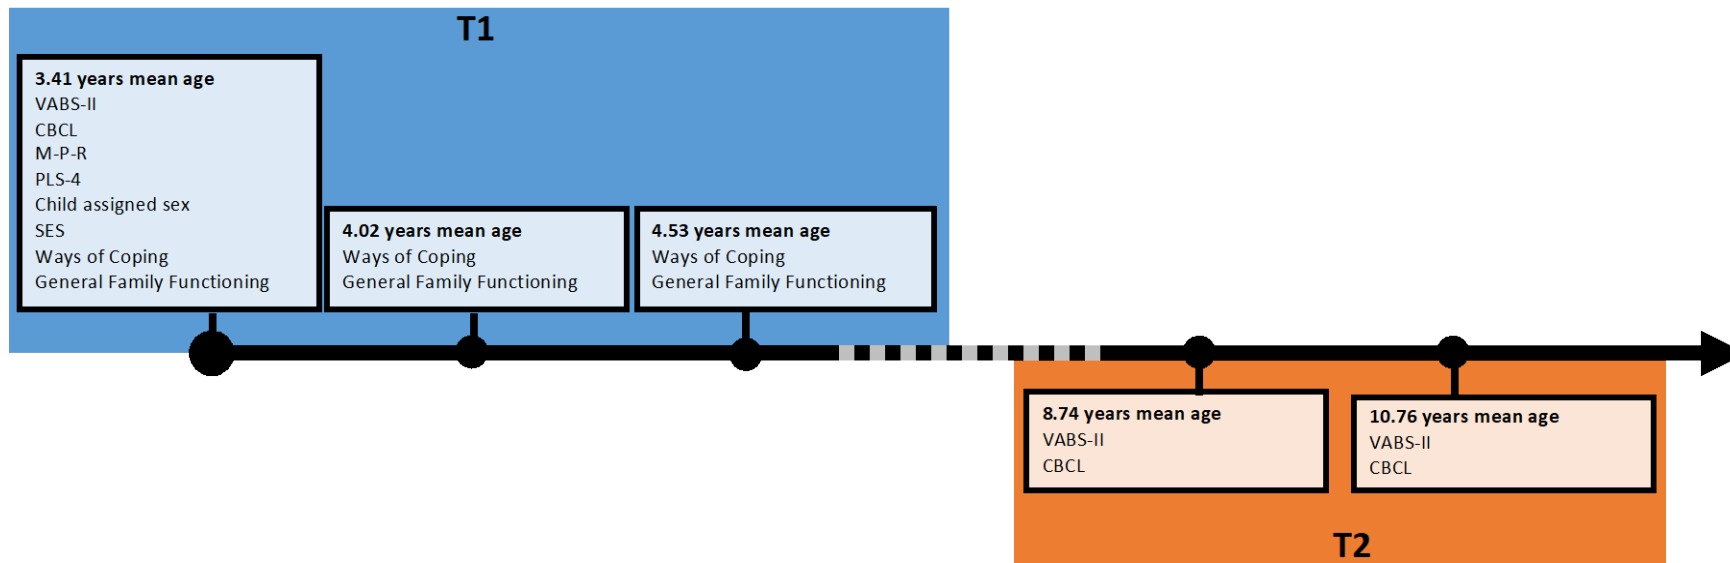

Supplement: jamanetwopen-e212530-s001.pdf [file jamanetwopen-e212530-s001.pdf]
